## Erratum

### ***CASQ1* Gene Is an Unlikely Candidate for Malignant Hyperthermia Susceptibility in the North American Population: Erratum**

In the February 2013 issue, the article on page 344 published with an incorrect DOI. The correct DOI for this article is 10.1097/01.anes.0000530185.78660.da.

#### **Reference**

Kraeva N, Zvaritch E, Frodis W, Sizova O, Kraev A, MacLennan DH, Riazi S. *CASQ1* gene is an unlikely candidate for malignant hyperthermia susceptibility in the North American population. *ANESTHESIOLOGY* 2013;118: 344–9
